# Supplementary material for: Identification of differentially expressed genes and pathways in mice exposed to mixed field neutron/photon radiation
Source: PubMed Central journal article supplement (PMC6027792; doi:10.1186/s12864-018-4884-6), 2018-06-28
Supplement: 12864_2018_4884_MOESM6_ESM.pdf [file 12864_2018_4884_MOESM6_ESM.pdf]

**Table S1**

Protein ubiquitination pathways upregulated in response to radiation exposure as identified by PANTHER analysis ( $p < 0.005$ ).

| Term                                                                                                                             | 0%       | 5%       | 15%      | 25%      | 83%      |
|----------------------------------------------------------------------------------------------------------------------------------|----------|----------|----------|----------|----------|
| ubiquitin protein ligase activity (GO:0061630)                                                                                   | 4.67E-10 | 7.01E-06 | 2.55E-08 | 3.73E-07 | 1.58E-09 |
| ubiquitin-like protein ligase activity (GO:0061659)                                                                              | 7.67E-10 | 9.53E-06 | 3.99E-08 | 5.41E-07 | 2.55E-09 |
| ubiquitin-like protein transferase activity (GO:0019787)                                                                         | 2.11E-09 | 7.75E-04 | 4.67E-06 | 1.76E-05 | 3.74E-10 |
| ubiquitin-protein transferase activity (GO:0004842)                                                                              | 7.57E-09 |          | 6.63E-06 | 3.05E-05 | 1.37E-09 |
| ubiquitin protein ligase binding (GO:0031625)                                                                                    | 9.33E-08 | 6.78E-06 | 6.62E-06 | 5.15E-06 | 3.50E-06 |
| ubiquitin-like protein ligase binding (GO:0044389)                                                                               | 2.84E-07 | 2.58E-06 | 6.66E-07 | 8.97E-07 | 1.73E-06 |
| ubiquitin binding (GO:0043130)                                                                                                   | 7.91E-07 | 1.92E-05 | 1.86E-06 | 1.43E-05 | 7.55E-04 |
| ubiquitin-like protein binding (GO:0032182)                                                                                      | 1.45E-06 | 6.36E-05 | 1.32E-05 | 1.54E-05 | 7.44E-04 |
| polyubiquitin modification-dependent protein binding (GO:0031593)                                                                | 1.79E-06 | 6.54E-07 | 1.75E-05 | 2.23E-06 |          |
| ubiquitin conjugating enzyme activity (GO:0061631)                                                                               | 4.94E-06 |          | 2.53E-04 | 1.64E-03 | 5.05E-06 |
| ubiquitin-like protein conjugating enzyme activity (GO:0061650)                                                                  | 6.58E-06 |          | 3.16E-04 | 1.95E-03 | 6.72E-06 |
| thiol-dependent ubiquitinyl hydrolase activity (GO:0036459)                                                                      | 2.21E-04 | 1.84E-03 |          |          |          |
| ubiquitinyl hydrolase activity (GO:0101005)                                                                                      | 2.21E-04 | 1.84E-03 |          | 1.16E-02 | 1.21E-02 |
| ubiquitin-like protein-specific protease activity (GO:0019783)                                                                   |          |          | 8.88E-03 | 1.09E-02 | 2.73E-02 |
| ubiquitin-like protein conjugating enzyme binding (GO:0044390)                                                                   | 4.70E-03 |          | 2.11E-02 |          | 1.30E-03 |
| deubiquitinase activator activity (GO:0035800)                                                                                   | 6.49E-03 |          |          |          |          |
| ubiquitin conjugating enzyme binding (GO:0031624)                                                                                | 7.28E-03 |          | 3.19E-02 |          |          |
| ubiquitin-specific protease binding (GO:1990381)                                                                                 | 1.59E-02 | 3.95E-02 | 3.81E-03 | 1.03E-02 |          |
| K63-linked polyubiquitin modification-dependent protein binding (GO:0070530)                                                     | 4.34E-02 | 2.03E-02 |          | 2.90E-02 |          |
| K48-linked polyubiquitin modification-dependent protein binding (GO:0036435)                                                     |          | 4.49E-03 | 1.04E-02 | 6.11E-03 |          |
| ubiquinol-cytochrome-c reductase activity (GO:0008121)                                                                           |          | 4.49E-03 |          | 6.11E-03 |          |
| ubiquitin-like protein-specific protease activity (GO:0019783)                                                                   |          | 4.74E-03 |          |          |          |
| ubiquitin-specific protease activity involved in negative regulation of ERAD pathway (GO:1904455)                                |          | 4.54E-02 |          |          |          |
| ubiquitin-specific protease activity involved in negative regulation of retrograde protein transport, ER to cytosol (GO:1904265) |          | 4.54E-02 |          |          |          |
| ubiquitin modification-dependent histone binding (GO:0061649)                                                                    |          |          | 1.58E-02 |          |          |
| ubiquitin protein ligase activity involved in ERAD pathway (GO:1904264)                                                          |          |          | 2.63E-02 |          |          |
| ubiquitin activating enzyme activity (GO:0004839)                                                                                |          |          | 2.70E-02 |          |          |
| ubiquitin conjugating enzyme binding (GO:0031624)                                                                                |          |          |          |          | 4.59E-04 |
| ubiquitin-ubiquitin ligase activity (GO:0034450)                                                                                 |          |          |          |          | 2.87E-02 |

Significantly enriched biological processes among genes upregulated in mouse blood after x-ray, neutron, or mixed field x-ray/neutron treatment relative to unirradiated controls ( $p < 0.005$ ). Benjamini-corrected p values are shown.
