# Supplementary material for: Identification of differentially expressed genes and pathways in mice exposed to mixed field neutron/photon radiation
Source: PubMed Central journal article supplement (PMC6027792; doi:10.1186/s12864-018-4884-6), 2018-06-28

Figure S2

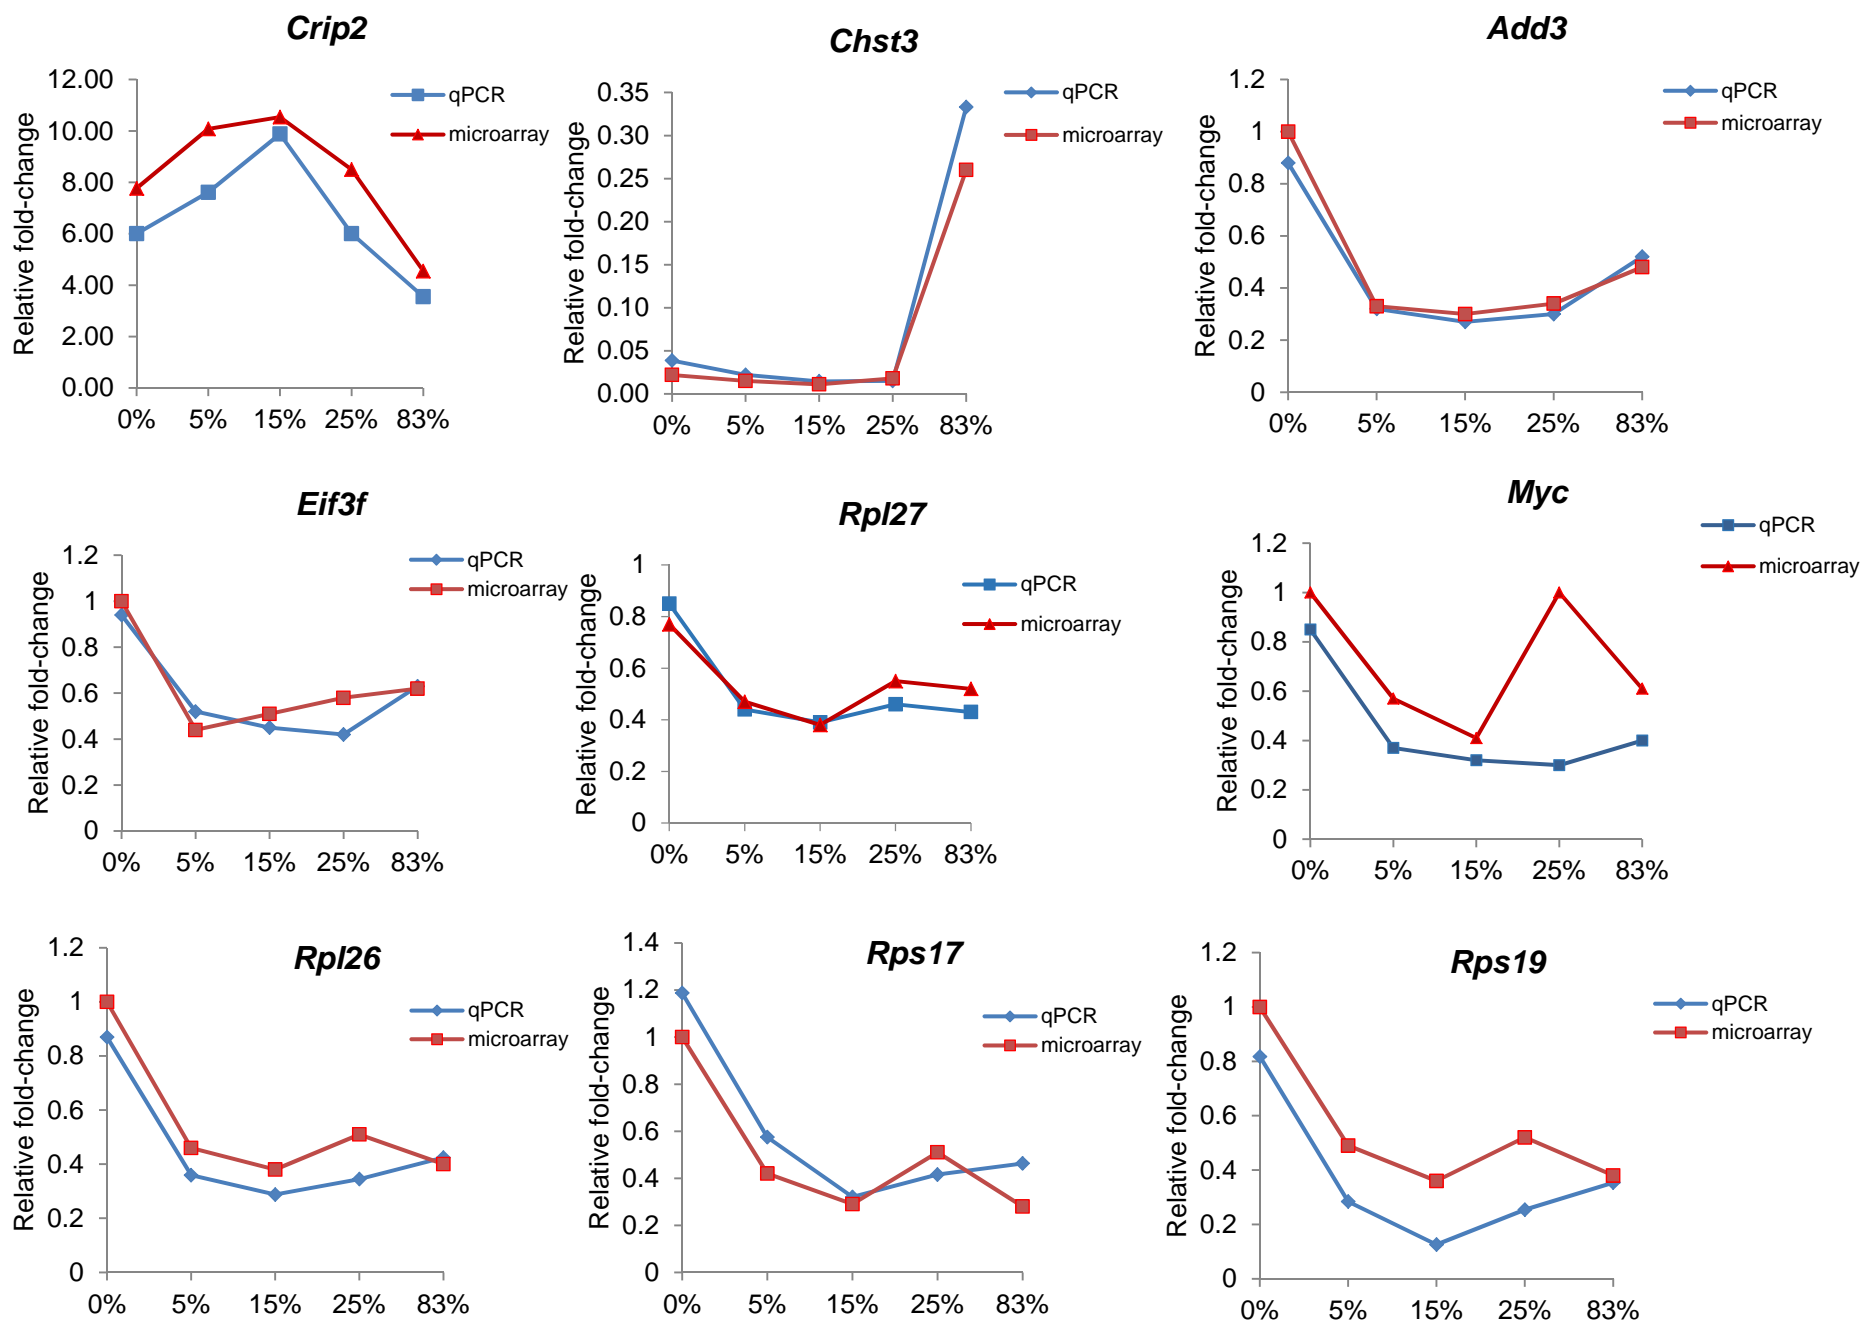

Supplement: 12864_2018_4884_MOESM8_ESM.pdf [file 12864_2018_4884_MOESM8_ESM.pdf]
